# Supplementary material for: 6′-Sialyllactose Ameliorates In Vivo and In Vitro Benign Prostatic Hyperplasia by Regulating the E2F1/pRb–AR Pathway
Source: PubMed Central journal article supplement (PMC6770807; doi:10.3390/nu11092203), 2019-09-12
Supplement: nutrients-11-02203-s001.pdf [file nutrients-11-02203-s001.pdf]

Supplementary data

Supplementary data 1.

A. Prostate weight (mg)

| Prostate weight (mg) |       |        |       |         |         |
|----------------------|-------|--------|-------|---------|---------|
|                      | CON   | BPH    | Fina  | 6SL 0.5 | 6SL 1.0 |
| 1                    | 104.5 | 975    | 855.9 | 755.5   | 833.2   |
| 2                    | 129.7 | 970    | 814.9 | 622.5   | 770.4   |
| 3                    | 145.6 | 851    | 755.7 | 794.9   | 686.7   |
| 4                    | 99.5  | 867.9  | 786.5 | 653.8   | 670.1   |
| 5                    | 152.5 | 1042   | 805.4 | 689.9   | 797.1   |
| 6                    | 101.9 | 1033.1 | 770.8 | 561.4   | 829.1   |
| 7                    | 142.8 | 918.7  | 866.5 | 562.7   | 891.9   |
| 8                    | 121.5 | 829    | 638.7 | 586     | 790.9   |

B. PW/BW (mg/g)

| Prostate weight/Body weight (PW/BW, mg/g) |          |          |          |          |          |
|-------------------------------------------|----------|----------|----------|----------|----------|
|                                           | CON      | BPH      | Fina     | 6SL 0.5  | 6SL 1.0  |
| 1                                         | 0.310089 | 3.037383 | 2.778896 | 2.489292 | 2.838842 |
| 2                                         | 0.370043 | 3.104    | 2.586984 | 1.844444 | 2.434123 |
| 3                                         | 0.441212 | 2.701587 | 2.605862 | 2.523492 | 2.339693 |
| 4                                         | 0.292647 | 2.633991 | 2.67517  | 1.966316 | 2.168608 |
| 5                                         | 0.42777  | 3.372168 | 2.767698 | 2.269408 | 2.725128 |
| 6                                         | 0.299706 | 3.749909 | 2.390078 | 1.846711 | 2.782215 |
| 7                                         | 0.391233 | 2.678426 | 2.690994 | 1.988339 | 3.054452 |
| 8                                         | 0.357353 | 2.648562 | 1.974343 | 1.691198 | 2.463863 |

C. Concentration of DHT (ng/mL)

| Concentration of DHT (ng/mL) |         |         |         |         |         |
|------------------------------|---------|---------|---------|---------|---------|
|                              | CON     | BPH     | Fina    | 6SL 0.5 | 6SL 1.0 |
| 1                            | 0.07956 | 6.22156 | 5.22186 | 5.12186 | 4.77658 |
| 2                            | 0.092   | 6.05984 | 4.8191  | 4.9191  | 4.85448 |
| 3                            | 0.07908 | 6.22156 | 5.07658 | 5.07658 | 5.02136 |
| 4                            | 0.06964 | 6.35984 | 5.05449 | 5.05449 | 4.8193  |

Supplementary data 2.

A. TETP ( $\mu\text{m}$ )

|   | TETP ( $\mu\text{m}$ ) |       |       |         |         |
|---|------------------------|-------|-------|---------|---------|
|   | CON                    | BPH   | Fina  | 6SL 0.5 | 6SL 1.0 |
| 1 | 12.52                  | 62.06 | 36.57 | 38.57   | 29.52   |
| 2 | 16.02                  | 64.22 | 35.22 | 36.57   | 30.98   |
| 3 | 14.95                  | 68.57 | 40.98 | 36.05   | 29.57   |
| 4 | 11.03                  | 60.56 | 36.05 | 38.23   | 27.51   |
| 5 | 13.77                  | 61.34 | 34.45 | 40.05   | 33.34   |

B. Relative protein level of AR, PSA and PCNA

|                                      |         | 1        | 2        | 3        | Average  | STDEV    |
|--------------------------------------|---------|----------|----------|----------|----------|----------|
| <b>AR/<math>\beta</math>-actin</b>   | Con     | 0.143489 | 0.130418 | 0.136943 | 0.13695  | 0.006535 |
|                                      | BPH     | 1.005648 | 0.994375 | 0.999977 | 1        | 0.005637 |
|                                      | Fina    | 0.02178  | 0.021419 | 0.021601 | 0.0216   | 0.000181 |
|                                      | 6SL 0.5 | 0.018962 | 0.015576 | 0.017269 | 0.017269 | 0.001693 |
|                                      | 6SL 1.0 | 0.023548 | 0.019263 | 0.021402 | 0.021404 | 0.002143 |
| <b>PSA/<math>\beta</math>-actin</b>  | Con     | 0.027681 | 0.02537  | 0.026527 | 0.026526 | 0.001156 |
|                                      | BPH     | 0.997591 | 1.002411 | 0.999998 | 1        | 0.00241  |
|                                      | Fina    | 0.025516 | 0.02531  | 0.025414 | 0.025413 | 0.000103 |
|                                      | 6SL 0.5 | 0.004065 | 0.005058 | 0.004562 | 0.004562 | 0.000496 |
|                                      | 6SL 1.0 | 0.003217 | 0.001611 | 0.002405 | 0.002411 | 0.000803 |
| <b>PCNA/<math>\beta</math>-actin</b> | Con     | 0.082634 | 0.079834 | 0.081249 | 0.081239 | 0.0014   |
|                                      | BPH     | 0.998171 | 1.001823 | 1.000006 | 1        | 0.001826 |
|                                      | Fina    | 0.35089  | 0.34736  | 0.349147 | 0.349132 | 0.001765 |
|                                      | 6SL 0.5 | 0.654035 | 0.67149  | 0.662682 | 0.662736 | 0.008728 |
|                                      | 6SL 1.0 | 0.648875 | 0.658303 | 0.653566 | 0.653582 | 0.004714 |

Supplementary data 3.

**A. Relative protein level of p-Rb and E2F1**

|                                      |         | 1        | 2        | 3        | Average  | STDEV    |
|--------------------------------------|---------|----------|----------|----------|----------|----------|
| <b>p-Rb/<math>\beta</math>-actin</b> | Con     | 0.738378 | 0.724048 | 0.731167 | 0.731198 | 0.007165 |
|                                      | BPH     | 1.00202  | 0.997988 | 0.999992 | 1        | 0.002016 |
|                                      | Fina    | 0.655888 | 0.657941 | 0.656918 | 0.656916 | 0.001026 |
|                                      | 6SL 0.5 | 0.755866 | 0.759546 | 0.757689 | 0.7577   | 0.00184  |
|                                      | 6SL 1.0 | 0.817904 | 0.837647 | 0.827731 | 0.827761 | 0.009871 |
| <b>E2F1/<math>\beta</math>-actin</b> | Con     | 0.168307 | 0.195236 | 0.181701 | 0.181748 | 0.013465 |
|                                      | BPH     | 0.992808 | 1.007221 | 0.999971 | 1        | 0.007206 |
|                                      | Fina    | 0.222529 | 0.225437 | 0.223996 | 0.223987 | 0.001454 |
|                                      | 6SL 0.5 | 0.152795 | 0.162743 | 0.157804 | 0.157781 | 0.004974 |
|                                      | 6SL 1.0 | 0.13951  | 0.137794 | 0.138662 | 0.138655 | 0.000858 |

**B. Relative protein level of Cyclin A, Cdk2, Cyclin D1 and Cdk6**

|                                           |         | 1        | 2        | 3        | Average  | STDEV    |
|-------------------------------------------|---------|----------|----------|----------|----------|----------|
| <b>Cyclin A/<math>\beta</math>-actin</b>  | Con     | 0.014724 | 0.016188 | 0.01544  | 0.015451 | 0.000732 |
|                                           | BPH     | 0.974503 | 1.02605  | 0.999446 | 1        | 0.025778 |
|                                           | Fina    | 0.022928 | 0.013648 | 0.018272 | 0.018283 | 0.00464  |
|                                           | 6SL 0.5 | 0.026949 | 0.027262 | 0.027102 | 0.027104 | 0.000156 |
|                                           | 6SL 1.0 | 0.040887 | 0.037225 | 0.039024 | 0.039045 | 0.001831 |
| <b>Cdk2/<math>\beta</math>-actin</b>      | Con     | 0.016609 | 0.017944 | 0.017285 | 0.017279 | 0.000667 |
|                                           | BPH     | 1.013841 | 0.986295 | 0.999864 | 1        | 0.013773 |
|                                           | Fina    | 0.239212 | 0.250837 | 0.245156 | 0.245069 | 0.005813 |
|                                           | 6SL 0.5 | 0.706553 | 0.681677 | 0.693938 | 0.694056 | 0.012438 |
|                                           | 6SL 1.0 | 0.260556 | 0.232279 | 0.246132 | 0.246322 | 0.014139 |
| <b>Cyclin D1/<math>\beta</math>-actin</b> | Con     | 0.142248 | 0.137735 | 0.140022 | 0.140002 | 0.002256 |
|                                           | BPH     | 0.981202 | 1.018977 | 0.999821 | 1        | 0.018888 |
|                                           | Fina    | 0.83125  | 0.812411 | 0.82183  | 0.82183  | 0.009419 |
|                                           | 6SL 0.5 | 0.541033 | 0.575316 | 0.557923 | 0.558091 | 0.017142 |
|                                           | 6SL 1.0 | 0.372308 | 0.375464 | 0.373912 | 0.373895 | 0.001578 |
| <b>Cdk6/<math>\beta</math>-actin</b>      | Con     | 0.065731 | 0.066908 | 0.066321 | 0.06632  | 0.000589 |
|                                           | BPH     | 1.005527 | 0.994487 | 0.999986 | 1        | 0.00552  |
|                                           | Fina    | 0.198023 | 0.203469 | 0.200715 | 0.200736 | 0.002723 |
|                                           | 6SL 0.5 | 0.504562 | 0.494734 | 0.499601 | 0.499632 | 0.004914 |
|                                           | 6SL 1.0 | 0.460078 | 0.456271 | 0.458181 | 0.458177 | 0.001903 |

**Supplementary data 4.****A. MTT assay**

| 6SL ( $\mu$ M) | 1        | 2        | 3        | 4        | 5        | 6        | Average  | STDEV    |
|----------------|----------|----------|----------|----------|----------|----------|----------|----------|
| DMSO           | 95.89928 | 99.20863 | 101.0791 | 101.0791 | 99.92806 | 102.8058 | 100      | 2.351539 |
| 3.125          | 89.4964  | 90.28777 | 106.1151 | 91.51079 | 92.66187 | 93.30935 | 93.89688 | 6.152054 |
| 6.25           | 88.20144 | 93.16547 | 92.30216 | 92.15827 | 90.5036  | 91.29496 | 91.27098 | 1.75791  |
| 12.5           | 94.17266 | 92.94964 | 99.56835 | 99.4964  | 98.1295  | 98.27338 | 97.09832 | 2.830793 |
| 25             | 95.03597 | 101.0791 | 104.6043 | 109.8561 | 99.35252 | 98.63309 | 101.4269 | 5.181138 |
| 50             | 89.20863 | 88.99281 | 98.48921 | 89.92806 | 98.1295  | 95.17986 | 93.32134 | 4.482059 |
| 100            | 79.71223 | 82.73381 | 88.77698 | 89.13669 | 88.48921 | 88.92086 | 86.29496 | 4.048705 |
| 200            | 75.03597 | 79.78417 | 76.04317 | 84.82014 | 77.05036 | 79.64029 | 78.72902 | 3.541634 |

**B. Relative protein level of AR and PSA**

|                     | 1        | 2        | 3        | Average  | STDEV    |          |
|---------------------|----------|----------|----------|----------|----------|----------|
| AR/ $\beta$ -actin  | -        | 1.006062 | 0.993963 | 0.999976 | 1        | 0.00605  |
|                     | 6SL 12.5 | 0.525118 | 0.51865  | 0.521892 | 0.521887 | 0.003234 |
|                     | 6SL 25   | 0.401662 | 0.416059 | 0.40877  | 0.408831 | 0.007199 |
|                     | 6SL 50   | 0.15763  | 0.158329 | 0.157982 | 0.15798  | 0.00035  |
| PSA/ $\beta$ -actin | -        | 0.992419 | 1.007577 | 1.000004 | 1        | 0.007579 |
|                     | 6SL 12.5 | 0.121689 | 0.107801 | 0.114832 | 0.114774 | 0.006944 |
|                     | 6SL 25   | 0.225937 | 0.209017 | 0.217298 | 0.217417 | 0.008461 |
|                     | 6SL 50   | 0.061443 | 0.068214 | 0.06483  | 0.064829 | 0.003386 |

Supplementary data 5.

**A. Relative protein level of p-Rb and E2F1**

|                                      |          | <b>1</b> | <b>2</b> | <b>3</b> | <b>Average</b> | <b>STDEV</b> |
|--------------------------------------|----------|----------|----------|----------|----------------|--------------|
| <b>p-Rb/<math>\beta</math>-actin</b> | -        | 1.022446 | 0.977635 | 0.99992  | 1              | 0.022405     |
|                                      | 6SL 12.5 | 0.479141 | 0.435467 | 0.4573   | 0.457303       | 0.021837     |
|                                      | 6SL 25   | 0.507523 | 0.47675  | 0.492205 | 0.49216        | 0.015387     |
|                                      | 6SL 50   | 0.380629 | 0.353555 | 0.367079 | 0.367088       | 0.013537     |
| <b>E2F1/<math>\beta</math>-actin</b> | -        | 0.9902   | 1.009806 | 0.999995 | 1              | 0.009803     |
|                                      | 6SL 12.5 | 0.319763 | 0.306186 | 0.312945 | 0.312965       | 0.006789     |
|                                      | 6SL 25   | 0.353403 | 0.355337 | 0.354375 | 0.354372       | 0.000967     |
|                                      | 6SL 50   | 0.164321 | 0.166728 | 0.165513 | 0.165521       | 0.001203     |

**B. Relative protein level of Cyclin A, Cdk2 and Cyclin D1**

|                                           |          | <b>1</b> | <b>2</b> | <b>3</b> | <b>Average</b> | <b>STDEV</b> |
|-------------------------------------------|----------|----------|----------|----------|----------------|--------------|
| <b>Cyclin A/<math>\beta</math>-actin</b>  | -        | 1.312585 | 0.742346 | 0.945069 | 1              | 0.289061     |
|                                           | 6SL 12.5 | 0.895574 | 0.741525 | 0.810681 | 0.815927       | 0.077159     |
|                                           | 6SL 25   | 0.834412 | 0.727465 | 0.777179 | 0.779686       | 0.053518     |
|                                           | 6SL 50   | 0.548709 | 0.750237 | 0.633269 | 0.644072       | 0.101197     |
| <b>Cdk2/<math>\beta</math>-actin</b>      | -        | 0.990932 | 1.009078 | 0.99999  | 1              | 0.009073     |
|                                           | 6SL 12.5 | 0.794188 | 0.800509 | 0.797345 | 0.797347       | 0.00316      |
|                                           | 6SL 25   | 0.908676 | 0.883768 | 0.896052 | 0.896165       | 0.012454     |
|                                           | 6SL 50   | 0.45015  | 0.465889 | 0.45792  | 0.457986       | 0.00787      |
| <b>Cyclin D1/<math>\beta</math>-actin</b> | -        | 1.181475 | 0.819895 | 0.998629 | 1              | 0.180794     |
|                                           | 6SL 12.5 | 1.561353 | 1.497086 | 1.528981 | 1.52914        | 0.032133     |
|                                           | 6SL 25   | 1.390017 | 1.106845 | 1.250778 | 1.249213       | 0.141593     |
|                                           | 6SL 50   | 0.585695 | 0.239658 | 0.410908 | 0.412087       | 0.173022     |
